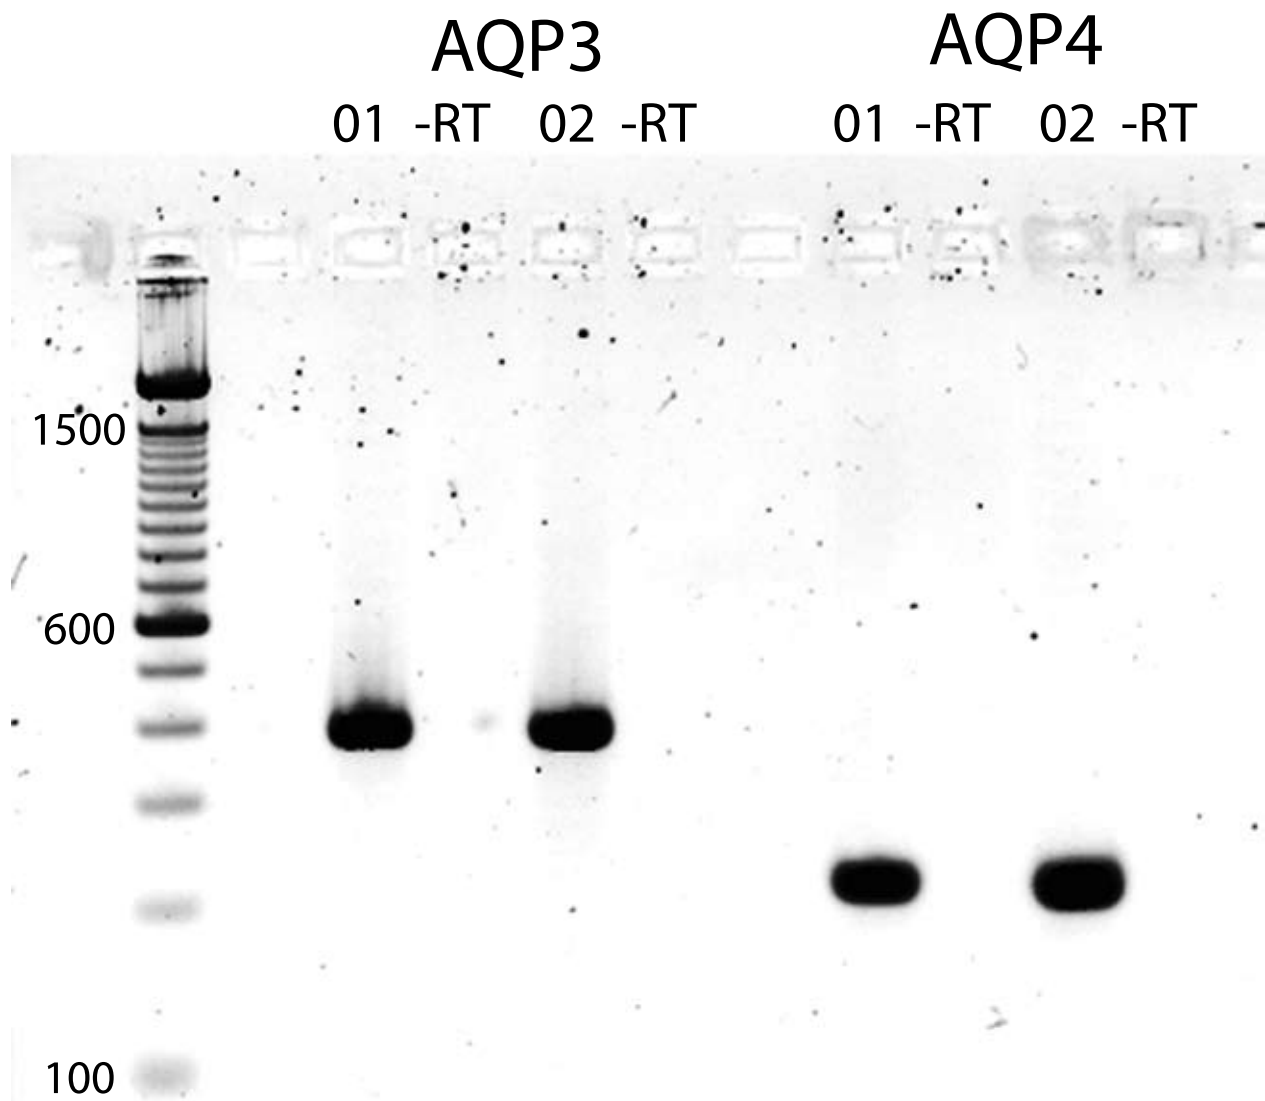

**Fig. S1. Expression of EsAQP3 and EsAQP4 in hagfish slime gland tissue.** Total RNA was extracted from the slime glands of two hagfish (01 and 02), and was reverse transcribed to cDNA. Target sequences 344 bp long for *EsAQP3* and 181 bp long for *EsAQP4* were amplified using reverse transcription (RT) PCR, and both homologs were found to be expressed in the slime gland. The products were run on a 1% agarose gel, and were sequenced to confirm their identity. First lane is a 100 bp DNA ladder, -RT lanes are non-reverse transcribed controls.

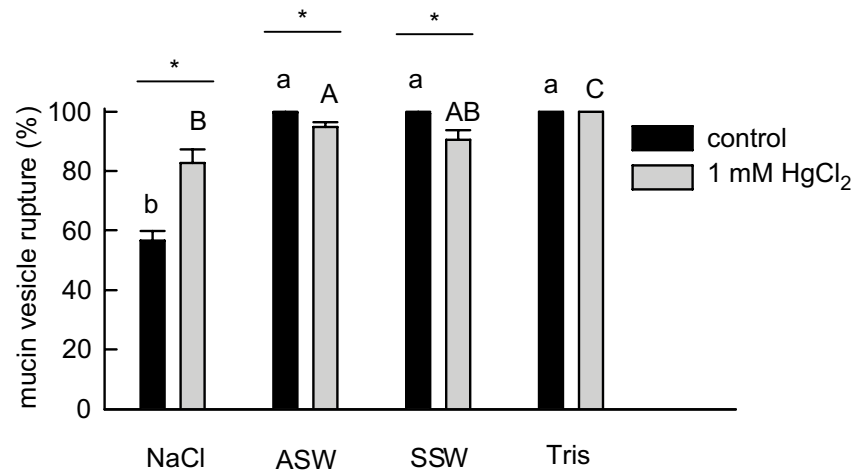

**Fig. S2. The effect of HgCl<sub>2</sub> on mucin vesicle rupture.** Vesicles treated with 1 mM HgCl<sub>2</sub> exhibited significantly higher percent rupture in 545 mM NaCl (Ca<sup>2+</sup>-free) than in control NaCl, but in artificial seawater (ASW) and simplified seawater (SSW, 10 mM CaCl<sub>2</sub> + 535 mM NaCl), significantly fewer vesicles ruptured over the exposure period (2 min). HgCl<sub>2</sub> did not affect vesicle rupture in a very hypotonic solution (5 mM Tris). Error bars are s.e.m.. Asterisks (\*) indicate significant differences between control and HgCl<sub>2</sub> treatments within each solution treatment. Lowercase letters indicate significant difference ( $p < 0.05$ ) among control treatments, and uppercase letters indicate significant differences ( $p < 0.05$ ) among solutions containing mercury. N = 6.

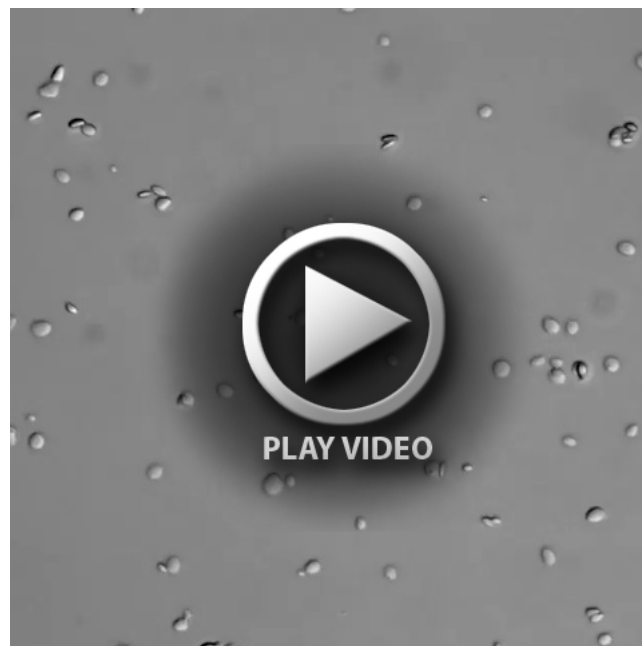

**Movie 1. Hagfish slime mucin vesicles treated with 0.1% Triton X-100 prior to exposure to simplified seawater (SSW, 10 mM CaCl<sub>2</sub> + 535 mM NaCl).** Videos were recorded at ~14 frames per second using a monochrome digital camera (Q-imaging Retiga Exi Fast1394) connected to a Nikon Eclipse 90i microscope (Nikon Instruments, Inc., Melville, NY). Videos were processed using NIS-Elements A.R. 3.0 software (Nikon Instruments, Inc.).

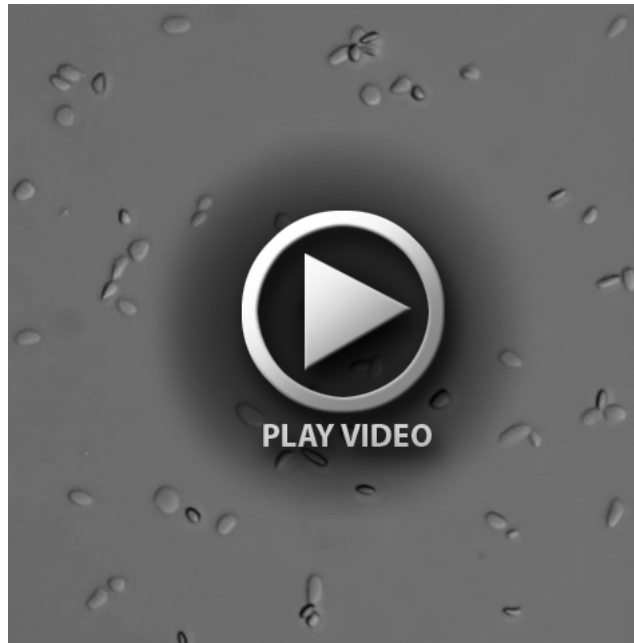

**Movie 2. Hagfish slime mucin vesicles exposed to artificial seawater (ASW).** Videos were recorded at ~14 frames per second using a monochrome digital camera (Q-imaging Retiga Exi Fast1394) connected to a Nikon Eclipse 90i microscope (Nikon Instruments, Inc., Melville, NY). Videos were processed using NIS-Elements A.R. 3.0 software (Nikon Instruments, Inc.).

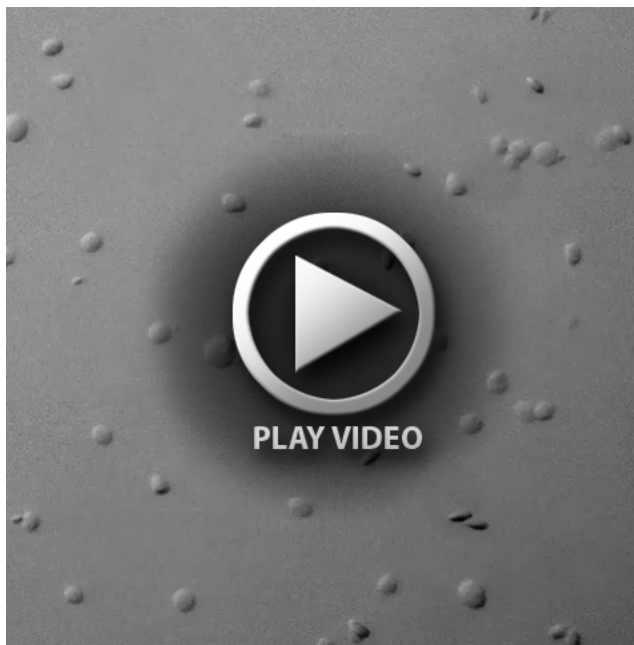

**Movie 3. Hagfish slime mucin vesicles treated with 1 mM  $\text{HgCl}_2$  prior to exposure to artificial seawater (ASW).** Videos were recorded at ~14 frames per second using a monochrome digital camera (Q-imaging Retiga Exi Fast1394) connected to a Nikon Eclipse 90i microscope (Nikon Instruments, Inc., Melville, NY). Videos were processed using NIS-Elements A.R. 3.0 software (Nikon Instruments, Inc.).

**Table S1. Primers used to obtain full length coding sequence for *EsAQP3* and *EsAQP4*.** Interspecies primers were developed using published AQP4 from *Eptatretus burgeri* (NCBI accession BAE93686.1).

| <b>Interspecies primers for <i>AQP4</i></b> |              |
|---------------------------------------------|--------------|
| 5'-GTTCGCAAAGCCACTCC-3',                    | F1_E.stouti  |
| 5'-CCCTGTCTGAACAAATGAGC-3',                 | R1_E.burgeri |
| 5'-TCTTCTGAGAAAGGACAGTCG-3',                | F2_E.burgeri |
| 5'-CCATTCTCACTCTGGATTTGC-3'.                | R2_E.burgeri |
| <b>AQP3 full length primers</b>             |              |
| F: 5'-CTGAGTACCTGATACCTCCTGA-3'             |              |
| R: 5'-GATGATAGATGCAGGACGAAGG-3'             |              |
| <b>AQP4 full length primers</b>             |              |
| F: 5'-CATGCCGCAAATAAGCAGAC-3'               |              |
| R: 5'-TCT TCTCCCTGTATGAACAAATGA-3'          |              |

**Table S2. *EsAQP3* and *EsAQP4* primers used in the detection of expression of these genes in the hagfish slime gland via RT-PCR.**

| <b>RT-PCR primers</b>           |          |
|---------------------------------|----------|
| 5'-GCGGGTCCTCGCACAGCGAATGCGC-3' | F_EsAQP3 |
| 5'-CCGCGGTCTCCATGCTCCAGGGT-3'   | R_EsAQP3 |
| 5'-CGACCTACACATCGCACTTG-3'      | F_EsAQP4 |
| 5'-ACGAGGTTGTGAAGGGTGAC-3'      | R_EsAQP4 |
